## Dark side of the honeymoon: reconstructing the Asian x European rose breeding history through the lens of genomics

5

Thibault Leroy<sup>1,2,3</sup>, Elise Albert<sup>1,4</sup>, Tatiana Thouroude<sup>1</sup>, Sylvie Baudino<sup>5</sup>, Jean-Claude Caissard<sup>5</sup>, Annie Chastellier<sup>1</sup>, Jérôme Chameau<sup>1</sup>, Julien Jeauffre<sup>1</sup>, Thérèse Loubert<sup>6</sup>, Saretta Nindya Paramita<sup>5</sup>, Alix Pernet<sup>1</sup>, Vanessa Soufflet-Freslon<sup>1</sup>, Cristiana Oghina-Pavie<sup>7</sup>, Fabrice Foucher<sup>1</sup>, Laurence Hibrand-Saint Oyant<sup>1\*</sup>, Jérémy Clotault<sup>1\*</sup>

10

<sup>1</sup> IRHS-UMR1345, Université d'Angers, INRAE, Institut Agro, SFR 4207 QuaSaV, Beaucouzé, France

<sup>2</sup> Department of Botany and Biodiversity Research, University of Vienna, Vienna, Austria

<sup>3</sup> GenPhySE, Université de Toulouse, INRAE, INPT, INP-ENVT, Castanet Tolosan, France

15

<sup>4</sup> Syngenta Seeds SAS, Saint-Sauveur, France

<sup>5</sup> LBVpam-UMR5079, Université Jean Monnet Saint-Etienne, CNRS, Saint-Etienne, France

<sup>6</sup> Roseraie Loubert, Les Rosiers-sur-Loire, Gennes-Val-de-Loire, France

<sup>7</sup> Université d'Angers, CNRS, TEMOS, SFR CONFLUENCES, Angers, France

20

\* These authors contributed equally to this work.

*Corresponding author: Thibault Leroy, GenPhySE, Université de Toulouse, INRAE, INPT, INP-ENVT, Castanet Tolosan, France [thibault.leroy@inrae.fr](mailto:thibault.leroy@inrae.fr)*

25

### Abstract

30

Roses have a specific symbolic charge in Western cultural heritage, often used as a metaphor for love and romance. Despite its ancient cultivation, the passion for the phenotypic diversity of roses is relatively recent, dating back to the early 19<sup>th</sup> century. During that century, the number of rose varieties has increased exponentially from roughly 100 to 8,000, in such a way that this period can be considered as the golden age for rose breeding. To retrace the history of rose breeding in Europe and shed new light on genetic changes during this period, we collected large phenotypic and genetic data from 204 accessions, including botanical roses and varieties bred between 1800 and 1910. We also used whole-genome sequences from 32 accessions as an extra resource. The genetic makeup of roses is remarkably consistent with a temporal shift from a historical European to a near-Asian genetic background within a few generations. Our analyses are consistent with a substantial erosion of the genetic diversity during this period, both because of the greater contribution of the Asian genepool - a less genetically diverse group - and of specific genomic footprints of selection, in particular regarding the extension of the blooming period. Thanks to this study, we have generated the largest GWAS catalog for roses to date, which can be used as a tool for future rose breeding programs. We particularly discuss the crucial importance of preserving ancient rose collections to safeguard genetic diversity and ensure a sustainable breeding for the long-term.

45

## 50 Introduction

The neolithic revolution, the move from nomadic hunter-gatherers to rooted agrarian societies, has profoundly changed the history of humankind (Diamond, 2002). This transition has allowed some populations to have larger food surpluses, favoring rapid population  
55 growth, a division of labor, technological innovations and, at the end, the establishment of dominant societies and colonizers (Diamond, 2005). Domestication is expected to generate drastic reductions in the effective population sizes due to the subsampling of the wild progenitor species and the selection pressures that have then further reduced population sizes, which have long been assumed to lead to sudden losses of diversity (Nei *et al.*, 1975;  
60 see Gaut *et al.*, 2015 for empirical evidences). Recent investigations thanks to ancient DNA samples, in sorghum in particular, are however more consistent with a long-term gradual, linear or nearly linear, decline rather than a rapid drop, questioning in part this bottleneck scenario (Allaby *et al.*, 2019; Brown, 2019; Smith *et al.* 2019).

65 Unlike species domesticated for food production, the domestication of floral plants for aesthetic purposes is assumed to be far more recent, which can therefore even more question the existence of reductions of genetic diversity over these short periods of time. For most of the ornamentals, domestication indeed occurred in the last 500 years (Purugganan, 2022). Economically secure groups, especially the bourgeoisie in search of luxuries or  
70 aesthetic pleasure, have played a major role in this advent, leading to an exploding number of ornamental species domesticated, in such a way that ornamentals have been described as outnumbering all other domesticated species combined today (Gessert, 1993, 2010; Chowdhuri & Deka, 2019). A typical example of this new passion for flowers in Western countries is tulips. Initially appreciated by Ottoman sultans and elites, the tulips imported to  
75 the Netherlands have led to a tulipmania, an irrational frenzy during the 17th century. Roses represent another emblematic example of domesticated flowers (Altman *et al.*, 2022), with a unique symbolic charge (Goody, 1993), and for which the golden age is assumed to be even more recent than tulips, dating back to the 19<sup>th</sup> century (Leus *et al.*, 2018).

80 Despite that roses have been cultivated since antiquity, independently in China and in the Mediterranean region, the number of varieties have long remained particularly limited. Thanks to considerable literature review efforts focusing on the 19<sup>th</sup> century, the history of a spectacular increase - by a factor 80 or so - in the number of rose varieties has however been revealed (~100 in 1800, 6000-8,000 in 1900, 30,000-35,000 today; Marriott, 2003;  
85 Oghină-Pavie, 2021). The diversification during the 19th century is associated with crosses between the two previously isolated genetic backgrounds, the Asian and European genepools, giving rise to a large number of horticultural groups, including hybrid tea cultivars from the late 19th century (Martin *et al.*, 2001). Hybrid tea cultivars are considered as the parents of the modern roses and are known to be phenotypically diverse, harboring traits that  
90 originate from Chinese roses, in particular the capacity of recurrent flowering, a particularly targeted trait that led to an extension of the flowering period in Europe (Marriott, 2003; Soufflet-Freslon *et al.*, 2021). Large-scale genetic investigation based on more than a thousand varieties genotyped at 32 SSR markers have indeed identified 16 genetic groups, most associated with a gradient of population structure from a European (groups 1-3) to an

95 Asian (group 9) genetic background during the 19th century, with more recent modern roses  
(>1914) exhibiting a close to Asian genetic structure (group 8, Liorzou *et al.*, 2016). Despite  
the progress made regarding the description of the genetic structure, there are many  
unknowns, including the number of generations of breeding, the levels of diversity and their  
evolution or the proportion of the respective European and Asian genomes. Similarly, while  
100 progress has been made regarding the description of genetic variation at some key genes of  
rose breeding, including *RoKSN* or *AP2*, two key genes controlling the duration of the  
blooming period and the doubling of the petal number, respectively (Iwata *et al.*, 2012;  
François *et al.*, 2018; Gattolin *et al.*, 2018; Soufflet-Freslon *et al.*, 2021), the genetic bases of  
most targeted traits in roses remain unknown.

105  
Roses represent an excellent ornamental model to reconstruct the past history of  
breeding and investigate the genomic footprints of artificial selection. First, and most  
importantly, roses are maintained and reproduced through vegetative culture, in particular  
grafting, allowing the continuous maintenance of ancient varieties. This allows the  
110 phenotyping of roses that were bred at different periods of time in a single environment. In  
addition, it allows easy access to fresh material and therefore modern DNA from these  
varieties, without requiring expensive and challenging strategies such as the use of ancient  
DNA samples. Second, several reference genome assemblies are available for roses, in  
particular from the variety 'Old Blush' (Hibrand-Saint Oyant *et al.*, 2018; Raymond *et al.*,  
115 2018), one of the four main ancient Asian roses used in plant breeding history (Liorzou *et al.*,  
2016). Third, roses have relatively small genomes, around 500-550 Mbp - which for instance  
contrasts with the 34-Gbp of the tulip genome - allowing the resequencing of some rose  
accessions at affordable cost. Fourth, other genetic resources are available for roses,  
including a high density SNP array (68,893 markers, Smulders *et al.*, 2015), making high  
120 resolution mapping and Genome-Wide Association Studies (GWAS) possible (Dietmar *et al.*,  
2016; Hibrand-Saint Oyant *et al.*, 2018). One challenge associated with the model however  
is the variable ploidy level among roses, ranging from diploid to decaploid, even if most roses  
are either diploid or tetraploid. GWAS methods were initially developed for diploid models,  
but more recent developments, in particular for polyploids (e.g. Rosyara *et al.*, 2016), provide  
125 new opportunities to uncover the genetic bases for important traits in roses. One additional  
difficulty associated with this model is the complexity of the genetic relationships in the *Rosa*  
genus, with a hundred or more wild species (Wisseemann & Ritz, 2007; Debray *et al.*, 2021),  
for which dozens of them may have genetically contributed to present-day rose diversity.

130 In this study, we reconstruct the history of the rose breeding in Europe. To do so, we  
assembled a unique dataset, composed of large phenotypic data, genetic data from 204  
roses genotyped with a 69k SNP array, plus whole-genome sequence data from 32 roses.  
The sequenced accessions are either botanical roses or varieties bred in Europe between  
1800 and 1910, and include star varieties at that time. Botanical roses are considered as wild  
135 species, but they are maintained in rose collections and are assumed to be non-intentionally  
selected. By combining population genomics and quantitative genetics analyses, we (i)  
described the genomic makeup of the rose varieties, (ii) provided an approximate number of  
generations of selection, (iii) estimated the levels of genetic diversity and investigated their  
evolution throughout the period, (iv) identified potential footprints of artificial selection, and (v)  
140 performed the largest collection of GWAS analyses to date to uncover the genetic bases of  
many horticulturally important traits.

## Results

### 19th century: directed or unintended evolution of some key rose traits

145

150

155

160

Asexual rose propagation through grafting and cutting allows the maintenance of ancient roses in gardens and therefore the direct comparisons of phenotypes obtained at different periods of the breeding history. We explored the phenotypic variation of a large collection of botanical and ancient accessions, representing more than 200 roses bred between 1800 and 1910 (Fig. 1A), a period which is considered as the golden age for rose breeding. Varieties investigated in this study are planted in a historical rose garden, in the Loire Valley, France (see Materials and Methods for details) where the roses grow in the same environment characterized by relatively milder and wetter conditions. In this study, we studied about 30 traits in 200+ varieties, including several presumably crucial traits for breeding, such as the blooming period, the color and number of petals, the number of prickles, the resistance to blackspot disease, plus some flower and plant architecture phenotypes (Fig. 1B). A particularly massive effort was made to analyze the floral scent by quantifying the volatile compounds of the collection using a GC-mass spectrometry strategy, including the 2-phenylethanol and the geraniol, which represent two main components of the floral rose scent (Spiller *et al.*, 2010; Magnard *et al.*, 2015; Roccia *et al.*, 2019; Caissard *et al.*, 2022).

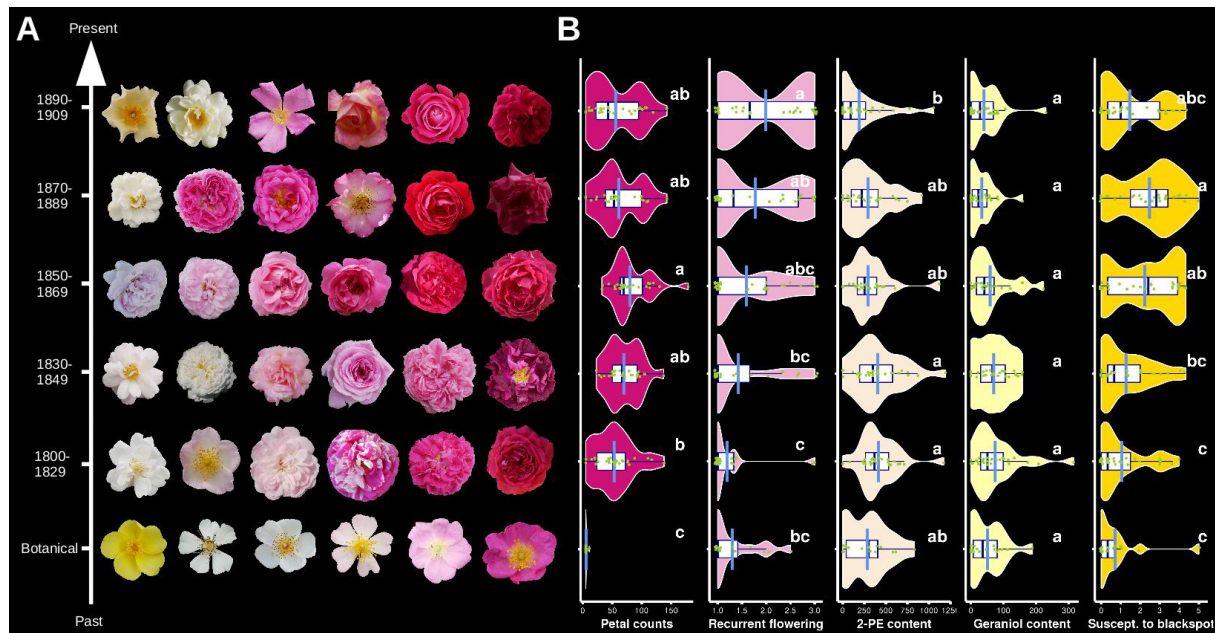

165

170

**Figure 1: Main phenotypic changes along the 19th century plant breeding history. A.** Pictures highlighting the phenotypic variation of flowers at different periods of the rose breeding history among the different accessions used in this study. Pictures were taken by T. Leroy in the Loubert rose collection in 2021 and 2022 and selected to be representative regarding the number of petals and the variation of colors observed among all the varieties of a given period. Pictures are not to scale. **B.** Phenotypic variation for some of the studied traits: number of petals (dark pink), recurrent flowering (light pink, estimated by an index), scent components (2-phenylethanol and geraniol contents, light beige and light yellow, respectively) and susceptibility to blackspot disease (yellow). Averages are shown with light blue lines. Tukey's honestly significant difference (HSD) tests at  $\alpha=0.05$  are indicated with letters.

175

Among all these traits, those associated with the flowering are expected to be the main target of selection during the 19th century, including the production of roses containing tens of petals and the ability to have an extended blooming period. Most botanical accessions indeed produce flowers containing only five petals (Fig. 1B) and during a limited period of time in spring. Based on our sampling, the mean number of petals has strongly increased during the first half of the 19th century (including roses with up to 210 petals), suggesting the crucial importance of this phenotypic selection at the beginning of the 19th century. From 1870, the trend reversed with a reduction of the mean number of petals. This suggests either the relaxation of this selective pressure for an increasing number of petals or a change in aesthetic preferences. The latter hypothesis appears the most likely from a historical perspective, for several reasons (i) varieties with up to 60 petals are nowadays preferred to obtain high-centered buds when the rose flowers are opened, (ii) the rosomania had led to the establishment of rose connoisseur communities from 1880, interested by new targets of selection, including wild-like phenotypes such as single flower (five petals) and spring roses (Oghina-Pavie, 2020). Indeed, at the end of the 19th century, additional rose species were used as breeding materials, such as *R. multiflora* and *R. rugosa*, with single flower and non-recurrent flowering phenotypes. Consequently, selection for roses with the ability to rebloom (recurrent blooming) is expected to represent another main historical target of the rose breeding. Phenotypic variation at this trait indeed supports a relatively constant increase of the repeat-flowering phenotype based on our rose collection, with a progressive increase of the mean of the recurrent blooming index during the 19th century (Fig. 1B).

A main criticism associated with modern roses is the popular impression of a reduction of the flower fragrance. Based on our collection of roses, a slight reduction was indeed observed during the 19th century based on the mean contents of both 2-phenylethanol and geraniol, two main components of the rose scent. Changes during this period are however either weakly significant or non-significant depending on the components, owing mainly to the large observed variance among roses of each period (Fig. 1B).

Temporal changes in the resistance to *Diplocarpon rosae*, a pathogen responsible for black spot disease - the most serious disease on garden roses today -, were also investigated. As compared to the previous examples, resistance to backspot was likely not directly selected by breeders at that time since rose growers started to show interests for *Diplocarpon rosae* (also called *Marssonina* ou *Marsonia rosae* Briosi & Cavara) at the beginning of the 20<sup>th</sup> century (Ducomet, 1903; Cristiana Oghina-Pavie, personal communication), even though today the resistance to *Diplocarpon rosae* represents one of the main breeding targets. Botanical roses from our collection exhibit exceptional resistance levels to *D. rosea* (*i.e.* low susceptibility score) but this resistance has progressively plummeted during the rose breeding history, at least until 1890 (Fig. 1B, see also Fig. S1), which therefore questions the origin of this erosion of resistance (loss of resistance alleles, introduction of more virulent strains, etc). Yellow and orange-colored roses are often suspected by breeders to be more susceptible to black spot, hypothetically leading to a trade-off between colors and resistance for breeders. No significant differences in susceptibility were however observed between varieties with different main color petals (Fig. S2). The hypothesis regarding the higher susceptibility of yellow flower varieties still remains open, since our sampling is biased toward pink and white flowers, largely underrepresenting the genotypes with yellow flowers, mostly because roses with yellow- or orange-colored flowers were relatively rare during the 19th century (Leus *et al.*, 2018).

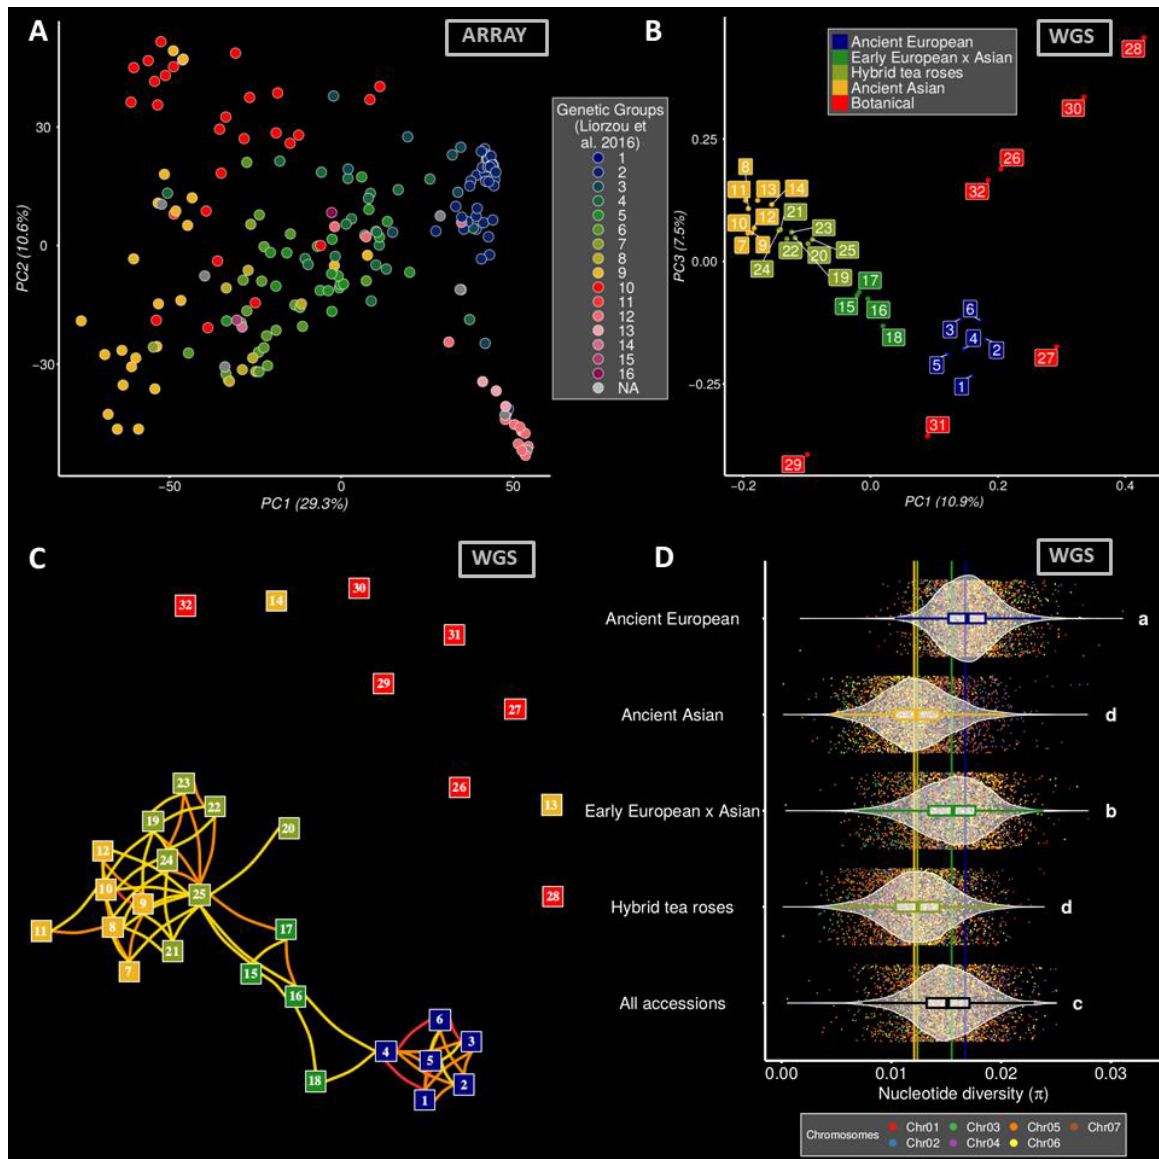

225 **Figure 2: Population structure and levels of genetic diversity in several rose groups**  
 used in the 19<sup>th</sup> century rose breeding history. **A.** Population structure of the 204 varieties  
 genotyped with the rose SNP array based on the two first axes of a Principal Component  
 Analysis (PCA). To check the consistency with previous works, the membership of the  
 230 samples to one of the 16 genetic groups defined by Liorzou and collaborators (2016) based  
 on the analysis of SSR markers are shown (for details, see Liorzou et al., 2016). Roses with  
 ancient European and ancient Asian backgrounds are shown in blue and yellow, respectively  
 (typically corresponding to groups 1-3 and 9, respectively; see also Fig. S4 and S5). **B.**  
 Population structure based on the whole-genome sequences used in this study. Axes 1  
 and 3 of a Principal Component Analysis (PCA) based on a random sampling of 50k SNPs.  
 235 Ancient European, ancient Asian, early European x Asian, hybrid tea varieties and botanical  
 accessions are shown in blue, yellow, green, khaki and red, respectively. Results from other  
 components as well as more detailed information about the cultivar IDs are shown in Figs.  
 S6 and Table S2 (but see also Fig. S7). **C.** Network of the relationships inferred based on the  
 kinship coefficients estimated under KING. First-, second- and third-degree relationships are  
 240 represented with red, orange and yellow lines, respectively. **D.** Genetic diversity estimates  
 based on the different groups. Distribution of the nucleotide diversity levels based on non-  
 overlapping 100 kb sliding windows spanning the genome (each dot corresponds to a  
 window). Genomic windows on chr00 are not included.

## 245 **A rapid shift from a European to an Asian genetic background**

250 The same large collection of rose varieties was genotyped at 68,893 SNPs using the Rose Genotyping Array (WagRhSNP Axiom Array, Koning-Boucoiran *et al.*, 2015), a SNP array developed from modern cut and garden roses. After clone-correction, a final set of 204 rose varieties was used for the subsequent analyses (see Materials and methods, Fig. S3 and Table S1). The first axis of a Principal Component Analysis (PCA) explains more than a quarter of the total variance (29.3%) and isolates the two ancient genetic backgrounds: an Asian one (in yellow) and an European one (in blue, Fig. 2A). The whole dataset forms a gradient of population structure between the two backgrounds, which is consistent with the frequent crosses between European and Asian roses throughout the 19th century. The second axis isolates some samples, including most of the botanical samples, from the Asian-European gradient. This population structure is consistent with a previous report based on the genotyping at 32 microsatellite markers of an even larger collection of varieties and the identification of 16 genetic groups (Fig. 2A, Liorzou *et al.*, 2016).

260 Independently from this first dataset, we resequenced 15 varieties and collected publicly available rose genomes to generate a dataset of 32 samples, composed of ancient Asian, ancient European, early European x Asian, hybrid tea and botanical samples. After joint-genotyping and SNP filtering, we generated a dataset of 77,862,879 filtered SNPs on the 32 samples. PCA based on a pruned set of 50,369 randomly selected SNPs (Fig. 2B) is consistent with an Asian-European gradient of population structure, as previously identified with the SNP array (Fig. 2A). The proportion of variance explained by the first axes is however lower based on the sequencing data, likely due to SNP ascertainment bias associated with the design of the array, since the SNP set was established based on the analysis of more modern varieties, therefore emphasizing more on the European-Asian gradient (*i.e.* the axis 1). Based on the WGS data, some axes can be built thanks to a single botanical individual (*e.g.* axes 2 and 4, Fig. S6), suggesting that a large proportion of the diversity is indeed only present in the botanical accessions.

270 Family relationships were then inferred using KING (Manichaikul *et al.*, 2010) based on the pairwise kinship values calculated on the sequencing data. Among the 32 samples, only a few individuals are not connected to at least another individual of the dataset through a third degree relationship (*i.e.* kinship coefficient > 0.0442) (Fig. 2C). These individuals correspond to all botanical samples, plus two ancient Asian samples (*R. odorata gigantea* and *R. chinensis spontanea*). The rest of the individuals are connected through a large network, linking the ancient European and the ancient Asian backgrounds through the early European x Asian and hybrid Tea varieties (Fig. 2C). This result is remarkably consistent with the expected history of selection during the 19th century, with (1) the intercrossing of the Asian genepool with the European one in the European breeding practices, (2) leading to the obtention of early European x Asian varieties, and (3) the backcrossing of these early hybrids with the ancient Asian genepool to obtain the hybrid tea varieties. Obtaining such a network with a so limited number of samples, and without integrating prior knowledge about the potential pedigrees, suggests that the selection was based on a quite narrow diversity, in terms of the number of varieties used. In addition, it suggests that the number of generations of selection was also very limited. Hybrid roses from the 19th century are indeed connected to Asian and European gene pools by less than 10 generations of breeding (Fig. 2C).

285  
290 SNPs with diagnostic alleles between the ancient Asian and ancient European samples were then identified, resulting in a subset of 170,637 diagnostic SNPs (Fig. S8). At these markers, the early European x Asian samples remarkably have a 1:1 ratio, *i.e.* an

295 almost equal share between the two gene pools (50.9% and 49.1% of Asian and European alleles, respectively), while hybrid tea roses have a 3:1 ratio (74.8% and 25.2% of Asian and European alleles, respectively).

### Genetic diversity erosion

300 Nucleotide diversity was estimated over non-overlapping 100-kbp sliding windows on the four groups (namely, ancient European, ancient Asian, early European x Asian and hybrid tea roses), each containing a total set of 16 chromosome sets after considering the inferred ploidy based on the distribution of allele balance (Table S2). Among all the dataset, the genetic diversity in roses was relatively high with an average  $\pi$  of  $1.47 \times 10^{-2}$  (Fig. 2D).  
305 Significant differences in diversity were observed between groups, with higher diversity in the ancient European ( $1.67 \times 10^{-2}$ ) than in the ancient Asian samples ( $1.20 \times 10^{-2}$ ).

The “early European x Asian” group exhibits an averaged nucleotide diversity of  $1.52 \times 10^{-2}$ , a value that slightly exceeds the expectation assuming both the previous estimates and the genetic makeup of this group (50.1%/49.1%, expectation:  $1.43 \times 10^{-2}$ ). This slight burst of genetic diversity in the first generations of hybridization could be explained by the mixing of parental alleles from the two quite divergent genetic backgrounds.

The hybrid tea group has a low nucleotide diversity (average  $\pi_{\text{observed}} = 1.21 \times 10^{-2}$ ; Fig. 2D), a level that is roughly similar to those of the Asian background ( $\pi_{\text{observed}} = 1.20 \times 10^{-2}$ ). This diversity is much lower than expected assuming the inferred population structure (74.8% Asian, 25.2% European,  $\pi_{\text{expected}} = 1.32 \times 10^{-2}$ ), corresponding to an average Reduction of Diversity index (RoD) of 8.1%. Given that these breeding history occurred in Europe and that hybrid tea roses have then been preferred to the early European x Asian hybrids in the gardens of residential homes, the evolution between hybrid tea roses and the other European groups is informative about the genetic loss during this period. Comparing these  
315 two groups, hybrid teas exhibit an important reduction of diversity as compared to the early European x Asian roses (average RoD=18.5%) and even more as compared to the ancient European accessions (average RoD=27.5%). One could argue that hybrid teas were exported worldwide, including in Asia and therefore that this history of selection could have contributed to an increase of the genetic diversity in Asia. Considering this hypothesis, we  
320 compared ancient Asian and hybrid tea and observed such a potential - albeit marginal - gain (RoD= -1.04%). Our results are therefore overall consistent with a net and rapid erosion of nucleotide diversity in Europe during the rose breeding of the 19<sup>th</sup> century.

The pattern of reduction of diversity between groups is consistent across the chromosomes, even if it varies in intensity (Fig. S9). Comparing the diversity of Hybrid tea as compared to ancient European roses, 2.3% of the windows exhibit a reduction of at least  
330 half of the diversity (105 among 4,628 windows with RoD exceeding 50%), a value that appears particularly strong given the extremely limited number of generations (Fig. 2C). The maximum observed RoD value on a window is 87.3%, but corresponds to an unanchored scaffold (Chr00) and should therefore be interpreted cautiously. The maximum value for a window anchored on a chromosome is 77.4% (Chr6: 11.2-11.3 Mb). Among the 60 windows  
335 with a ROD>0.5 and that are not located on unanchored scaffolds, 35% (21) and 43% (26) are located on chromosomes 3 and 5, respectively, suggesting that these two chromosomes were particularly targeted by artificial selection.

340



## Detecting local genomic footprints of artificial selection

To know more about the history of rose breeding, we investigated how the genomic landscapes of diversity and Tajima's D have evolved during the rose breeding history (Fig. 3). All landscapes of nucleotide diversity are highly correlated between groups (Fig. S10), even those of the ancient European and ancient Asian groups (Pearson's  $r=0.301$ ,  $p=3.57e^{-87}$ ). However, the Tajima's D landscapes of these two groups are independent (Pearson's  $r=-0.02$ ,  $p=0.20$ ), suggesting that the correlations of the genomic landscape of diversity are not associated with similar selection targets, but rather more likely shaped by some long-term shared genomic features (e.g. the recombination landscape, Shang *et al.*, 2023). The genomic landscapes of diversity become more and more correlated with time, especially when compared to the ancient Asian background (ancient Asian vs. early European x Asian samples, Pearson's  $r=0.408$ ,  $p=1.44e^{-165}$ ; ancient Asian vs. hybrid tea samples, Pearson's,  $r=0.566$ ,  $p=0$ ). Consistently, the Tajima's D landscapes of the hybrid tea is more correlated with the one of the ancient Asian (Pearson's,  $r=0.339$ ,  $p=9.26e^{-112}$ ) than with the one of ancient European samples (Pearson's,  $r=0.170$ ,  $p=2.70e^{-28}$ ). However the high level and significance of the latter correlation also suggest that artificial selection also targeted alleles from European origin in some genomic regions.

Interestingly, the genomic landscapes of nucleotide diversity and Tajima's D are significantly correlated in ancient European (Pearson's  $r=0.061$ ,  $p=9.78e^{-5}$ ), as well as in ancient Asian samples (Pearson's  $r=0.430$ ,  $p=2.79e^{-185}$ ). However this correlation largely differs in intensity between the two groups. This result is consistent with the lower diversity (Fig. 2D) and the larger variance in Tajima's D in the ancient Asian group (Fig. S11). All together, these results suggest that ancient Asian samples were more impacted by artificial selection prior to their use in the European plant breeding programs than the ancient European samples. Our genomic evidence could be interpreted with regards to the documented knowledge of the long-term history of rose cultivation in China. Chinese roses have been widely cultivated since the Han Dynasty, and selection is known to have occurred during this period, at least for some important traits, including the extension of the flowering period.

In order to identify some local genomic footprints of selection, we used hybrid tea roses as references. Indeed, given the limited number of generations of breeding detected (Fig. 2C), the use of hybrid teas allows us to maximize the probability of identifying local footprints of artificial selection. Hybrid tea genomes were scanned for windows exhibiting a shared signal of (i) low  $\pi$ , (ii) negative Tajima's D and (iii) high RoD  $\pi_{\text{Hybrid Tea}}$  vs. either  $\pi_{\text{Asian}}$  or  $\pi_{\text{European}}$  (Fig. 3; see Materials & Methods for details). Eighteen windows were detected using the most stringent criteria (last centile of the three metrics, purple lines in Fig. 3), including 15 on a 4-Mb region of the chromosome 3 (from 24.1 and 28.2 Mb, see Table S3). This region is in the immediate vicinity of a previously characterized 5Mb-inversion containing the *RoKSN* gene (28.8 - 33.1 Mb, Kawamura *et al.* 2022), a presumably main target breeding to obtain recurrent-blooming roses with an extended period of blooming. In addition, to these 18 windows, we detected 81 additional windows (last five centiles of the three metrics, pink lines in Fig. 3). Remarkably, five of these additional windows are located at the very end of the inversion (32.5 - 33.1Mb, see Table S3), therefore providing additional support that this footprint is associated with the artificial selection of Asian alleles at *RoKSN*. In the immediate vicinity of the inversion, we find also an homologue of *AP2/TOE* (RC3G0243000, 33.2Mb), another crucial gene controlling the double flower phenotype and therefore partly the number of petals (François *et al.*, 2018; Hibrand-Saint Oyant *et al.*,

2018). However, *AP2/TOE* is unlikely to be the causative gene, suggesting that recurrent-  
390 flowering alleles of *RoKSN* were the main target of artificial selection (see also  
Supplementary Note 1). The three additional windows detected using the most stringent  
filtering criteria are located on chromosome 5 (two adjacent windows, between 22.9 and 33.1  
Mb) and on chromosome 1 (33.6-33.7 Mb, Table S3). Most of the additional regions based  
395 on the less stringent criteria (last five centiles, see Table S3) are consistent with these three  
previously detected genomic regions (*i.e.* on chromosomes 1, 3 and 5), but also highlighted  
a fourth region on chromosome 7 (11 windows between 15.9 and 21.1 Mb, Fig. 3 and Table  
S3).

400

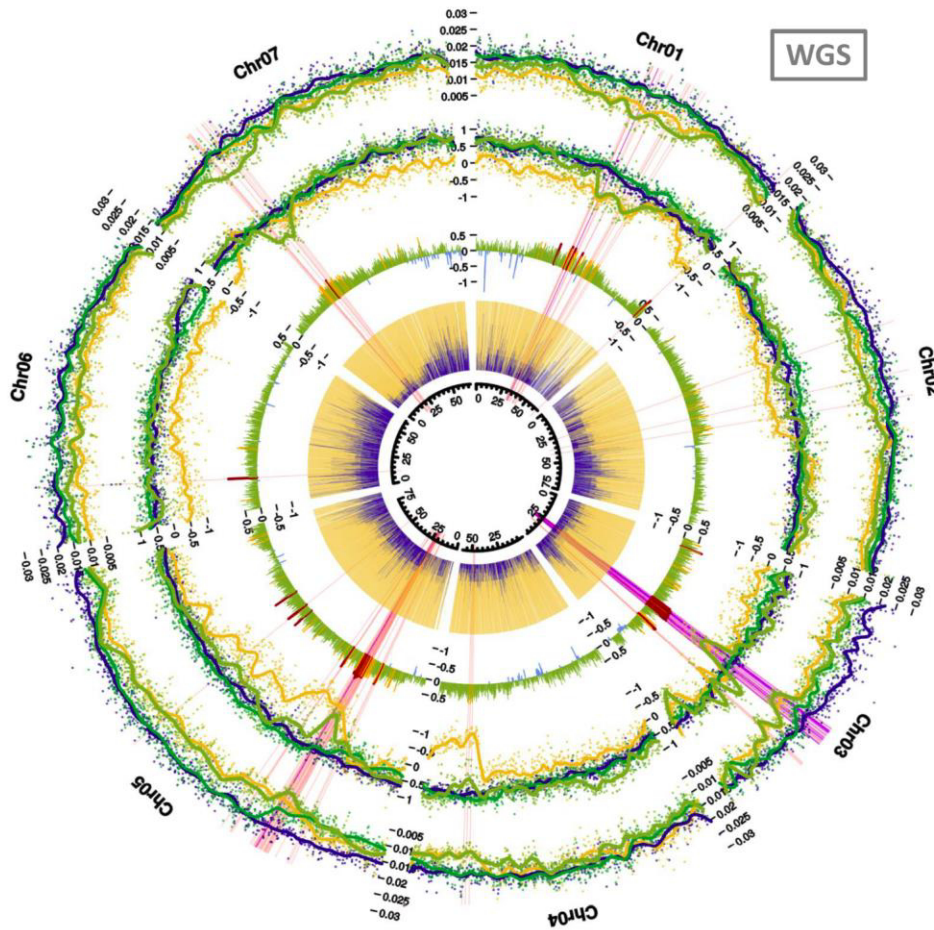

**Fig. 3: Detection of regions exhibiting footprints of artificial selection in hybrid tea roses.** From external to internal: nucleotide diversity, Tajima's *D*,  $RoD_{Hybrid\ tea\ vs.\ Ancient\ European}$ , and local ancestry as estimated at diagnostic SNPs. Blue and yellow refer to ancient European and ancient Asian backgrounds respectively, while dark and light green refer to early European x Asian and hybrid tea groups, respectively. Pink and purple lines correspond to windows that simultaneously exhibit one of the lowest nucleotide diversity (bottom 5% or bottom 1%, respectively), one of the lowest Tajima's *D* (bottom 5% or bottom 1%, respectively) and one of the highest  $RoD$  (either in  $RoD_{European\ vs.\ Hybrid\ tea}$  or  $RoD_{Asian\ vs.\ Hybrid\ tea}$ , top 5% or top 1%, respectively). Results from chr00 (corresponding to all unanchored scaffolds in Hibrand-Saint Oyant et al., 2018) are not shown.  
405  
410

## The largest rose GWAS catalog to date

415

In addition to reconstructing the history of rose breeding, we conducted large Genome-Wide Association Studies (GWAS) with the aim of identifying associations between the genotypes at the 204 varieties and the different phenotypes. Given the large number of phenotypes we have investigated, as well as the variety of scenarios possible regarding dominance in polyploids (Rosyara *et al.*, 2016), a dedicated website portail has been created in order to explore all the results (hereafter referred to as the rose GWAS browser, <https://roseGWASbrowser.github.io/>). The online browser allows to select a category of traits (e.g. petal counts or colors, plant architecture, scent), then a specific trait (e.g. 2-phenylethanol content), and select a specific scenario regarding the polyploid gene action, among additive, simplex dominant and duplex dominant scenarios. For some traits, the GWAS explorer not only reports the results of the GWAS when the trait was analyzed quantitatively, but also when analyzed qualitatively, which can be meaningful when distribution of the trait values are more bimodally distributed.

420

425

430

435

440

445

The rose GWAS explorer is a tool designed to accelerate research on rose breeding. As a textbook example, we have decided to focus on the identification of genomic regions that correlated with the resistance to the black spot disease, which is the most impacting disease in garden roses. To identify some regions, we performed GWAS for three years of scoring (Fig. 4). The number of significantly associated SNPs greatly vary depending on the year of scoring (red dots, Fig. 4). The relative lack of resolution is likely associated with the difficulty of performing GWA studies in populations for which phenotypes still highly correlate with the population structure gradient as a result of the limited number of generations (e.g. see Fig. S1). Indeed, similar results were observed for most of the investigated traits. As a consequence, all the results should be interpreted with some caution, requiring further validation through independent analyses. Here, some potential genomic regions of interest are detected, including a genomic region at the very end of chromosome 4 which is associated with the three years of scoring. Additional locations are also observed on chromosome 3 for some of the years, including in a region that collocates with a meta-QTL recently identified in three different experimentally segregating populations, which were phenotyped for blackspot disease over several years and locations (Lopez-Arias *et al.* 2020).

## Discussion

### Evolution of the genetic diversity in roses

450

455

460

Genetic diversity is one fundamental unit of biodiversity, since sufficient within-species diversity is needed to face different threats, including diseases, pests, changes in climate, as well as more intrinsic factors associated with evolution under low effective population sizes, and therefore reduce mid- and long-term extinction risks. In December 2022, as part of the United Nations Biodiversity Conference (COP15), the post-2020 framework of the Convention on Biological Diversity was enacted (CBD, 2022). Among the four goals and 23 targets, the adopted framework includes central ambitions regarding the maintenance and the restoration of the genetic diversity in wild species, but also in domesticated species, in order to safeguard their adaptive potential (Goal A & Target 4). The reduction of diversity of domesticated species has often been viewed as a less vital topic as

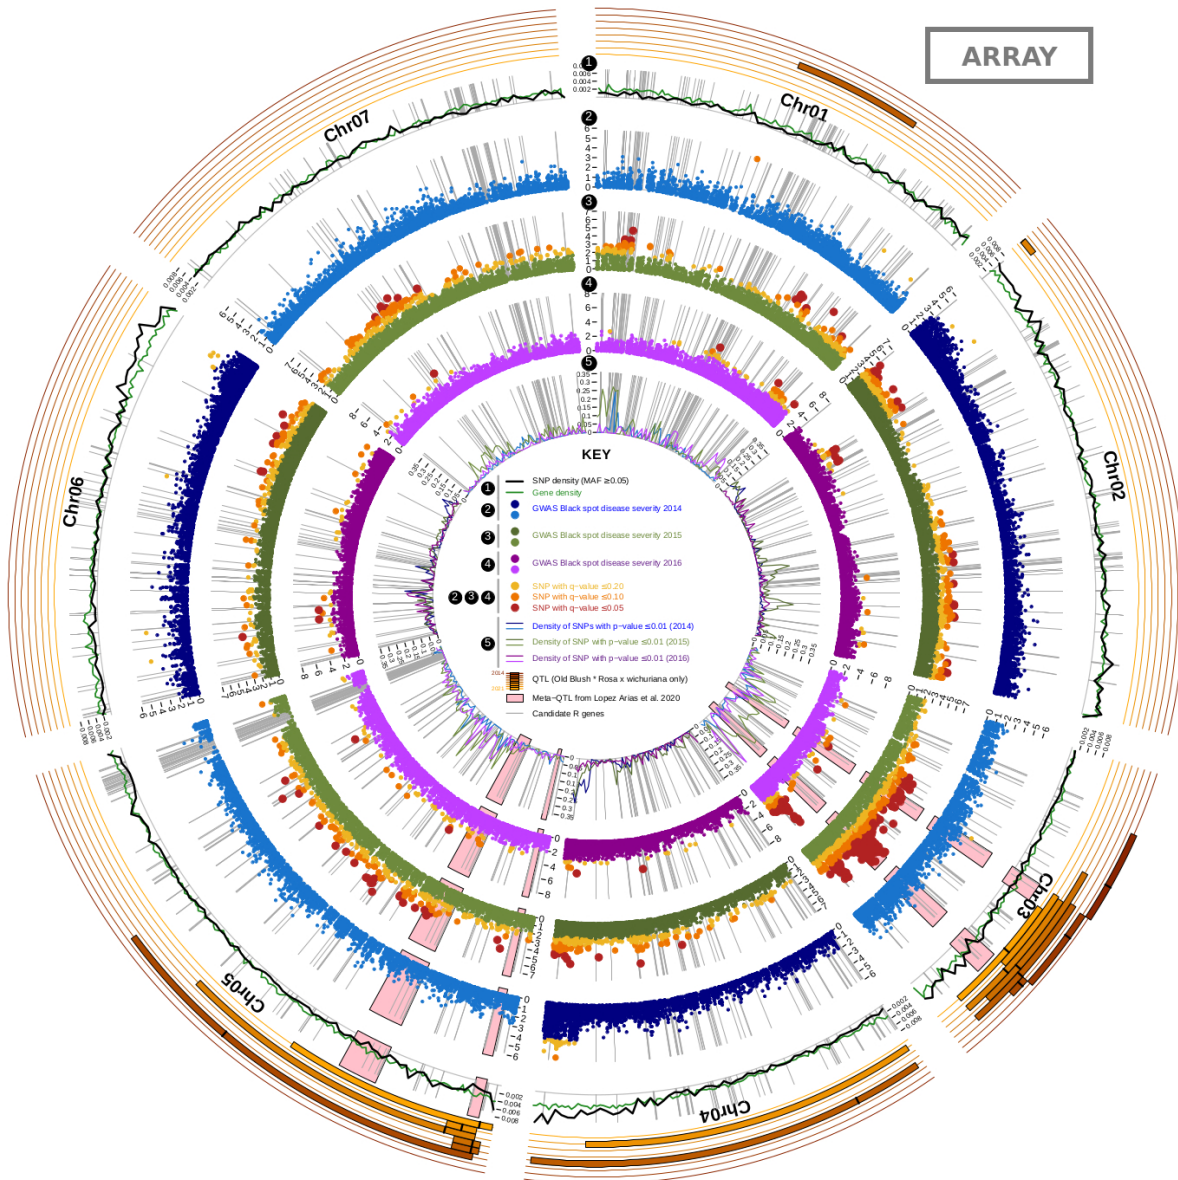

**Figure 4: GWAS for blackspot resistance.** 1: Per-window SNP array density and gene density based on the reference genome (Hibrand-Saint Oyant et al., 2018). 2-4: Manhattan plots of the q-values along the genome for the three years of scoring (2: 2014, 3: 2015, 4: 2016). SNPs with q-values  $< 0.20$ ,  $0.10$  and  $0.05$  are shown in yellow, orange and red, respectively. 5: Local density in highly associated SNPs ( $p$ -value  $< 0.01$ ) for each of the three years of scoring (2014, 2015 and 2016 are shown with blue, green and purple lines). QTLs and metaQTLs from Lopez-Arias et al., 2020 based on three segregating populations (connected by male resistant parent Rosa x wichuriana) are also shown. The candidate R genes correspond to an expert annotation of NBS-LRR encoding genes (Lopez-Arias et al., 2020). Results for SNPs located on chr00 (corresponding to all unanchored scaffolds in Hibrand-Saint Oyant et al., 2018) are not shown here (these results are however available online, <https://rosegwasbrowser.github.io/blackspot/>).

475

480 compared to the preservation of wild species. The recent report of a sharp reduction of the genetic diversity in bread wheat, with a loss of diversity of around 30% over the 20<sup>th</sup> century (Pont *et al.*, 2019), should make us question the potential consequences regarding the worldwide food security, given the central importance of cereals in the human and domesticated animal diet.

485 In the present study, we have questioned how the diversity has evolved during the 19<sup>th</sup> century, a century corresponding to the golden age for European rose breeding, with an exploding number of varieties (estimated to be around 100 in 1800 and to be 8,000 in 1900; Marriott, 2003, Oghină-Pavie, 2021). Our result is consistent with a substantial reduction of diversity, of around 27.5% in a century in Europe (Fig. 2D), comparing the ancient European and the hybrid tea roses. This reduction has taken place across a very limited number of generations (< 10, Fig. 2C) and is associated with both the backcrossing with a pre-selected  
490 Asian genetic background (Figs. 2 & S4-7) and with additional footprints of artificial selection (Fig. 3). Despite that this reduction of the global genetic diversity could be considered as more anecdotal regarding a horticultural species as compared to a crop species such as bread wheat, the fact that roses represent a common heritage of mankind, with a shared imagery of lover and beloved, and an important charge in some monotheistic religions and political parties should also be considered. In roses, grafting however makes the long-term  
495 maintenance of ancient varieties possible, allowing the backcrossing of modern varieties, improved regarding some specific traits, with more ancient and genetically diverse varieties. This restoration of this genetic diversity is however only possible if the ancient garden roses are maintained over the long term. In roses, two main action targets should be therefore  
500 proposed: (i) increasing effort, especially regarding state funding, for safeguarding gardens containing botanical and ancient varieties, and (ii) alert the stakeholders of the importance of maintaining and restoring the genetic diversity in order to ensure a sustainable breeding for long-term, which could be associated with new future breeding targets (*e.g.* new emerging diseases, anthropogenic disturbances or ecosystemic services in urban areas).

505

### Looking back in time to identify selection targets

510 Another tremendous advantage of the use of grafted garden roses as domesticated plant models is our ability to phenotype varieties bred during more than a century all together at the same time in a common rose garden. Phenotypically, we indeed have reported important temporal changes in the number of petals, the ability of roses to bloom several times in a year and the susceptibility to the black spot disease (Fig. 1), even if the latter trait evolution was likely unintended. The temporal increase in the number of petals is relatively  
515 continuous until 1870, before a slight reduction on average, which seems more associated to the progression toward a bimodal distribution for this specific trait and questions the diversification of the consumer tastes at that time, including the return to simple flowers for some varieties (Fig. 1; see also Oghina-Pavie, 2020). Roses of a given period should not be considered as a homogeneous ensemble, they are rather representative of different tastes  
520 and breeding objectives among breeders, in such a way that the history of breeding should not be oversimplified. Similarly to petal counts, the susceptibility to black spot has increased until 1890, before a reduction on average, again associated with a marked bimodal distribution (Fig. 1).

525 The extension of the flowering period by selecting recurrent blooming varieties was often assumed to be the main target of selection during the 19<sup>th</sup> century. Consistently,

during this period, we indeed observed a continuous increase of an index that measures the ability of a rose to rebloom (Fig. 1). Such a continuous selection has likely contributed to generate a marked footprint of selection in rose genomes, since the sharpest signature of the selective sweep is observed above one of the two breaking points of a previously characterized 5-Mb inversion of the *RoKSN* gene (chromosome 3, 28.8 - 33.1 Mb, Hibrand-Saint Oyant *et al.*, 2018; Kawamura *et al.*, 2022). Consistent signal was also observed at the second breaking point (Fig. 3), in agreement with the selection in this region. Several alleles at the *RoKSN* genes leading to the extended period were described, including a *ROKSN<sup>copia</sup>* and a *ROKSN<sup>NULL</sup>*. Previously, it was demonstrated a progressive selection of the *ROKSN<sup>copia</sup>* allele during the 19th century (Soufflet-Freslon *et al.*, 2021). This allele is not present in the reference genome we used, this genome contains a large rearrangement at the *RoKSN* locus leading to the *ROKSN<sup>NULL</sup>* allele (Hibrand-Saint Oyant *et al.*, 2018). This rearrangement may explain the complexity of the local footprints associated with the nucleotide diversity and Tajima's D landscapes. Additional footprints have been also uncovered, but currently were not associated with any previously reported genes. In the future, thanks to more numerous whole-genome sequences available, as well as the new technological and methodological developments allowing the access to phased polyploid genomes, a much clearer picture could be anticipated. Extending these investigations to the 20<sup>th</sup> century could be of particular interest, since more modern roses are characterized by a clearer distinction between the genetics used for garden vs. cut roses. Cut roses - especially red ones - have potentially experienced a more intense reduction of global genetic diversity and more pronounced local footprints of selection, as typical expected based on the huge difference of the two respective markets (e.g. in France in 2018, garden roses: 50M€, cut roses: 376M€, Clotault *et al.* 2022).

550

### Advances and challenges for GWAS in roses

As a tool for the future of rose breeding, we have released the largest GWAS catalog for roses (<https://roseGWASbrowser.github.io/>). Our GWAS browser allows the website visitors to explore the association with more than 25 traits, on the basis of our panel of 204 accessions. The objective is to make future breeding more effective for some traits, including the resistance to the blackspot disease (Fig. 4). This trait represents a typical example of an important target need in order to find sources of genetic resistances in roses, in the context of a tightening environmental legislation associated with the use of chemicals due to their deleterious environmental impacts and health risks.

Despite the great advance made with the release of the GWAS catalog, the direct insights appear however relatively limited to date. Indeed, the GWAS strategy in our panel has generated few repeatable and easily interpretable signatures of associations. As compared with the use of QTL mapping in experimental crosses, extensive GWAS analyses seem to have a more limited benefit in rose than on some other domesticated or non-domesticated species (e.g. Korte & Farlow, 2013; Alqudah *et al.*, 2020). Several non-mutually exclusive reasons could explain this paradox: (i) a too limited number of varieties used in our study, (ii) the limited number of generations of recombination in the investigated collection (Fig. 2C) that could contribute to maintaining a predominant association with the population structure, leading to a low statistical power in the model. Combining GWAS and QTL approaches (Fig. 4), when available, offer the possibility to increase the statistical support for some regions of interest, extend the allelic diversity by considering other alleles

575 than those segregating between the parents, precise the genomic locations of the associated  
580 regions and prioritize the research effort. As a typical example, the last third of chromosome  
3 could appear as a more promising region for selection, therefore guiding the research  
efforts in this direction. Remarkably, the chromosome 3 has been associated to many traits  
in roses (resistance to black spot, but also number of petals, fragrance, prickles, recurrent  
blooming, self-incompatibility; e.g. Hibrand-Saint Oyant *et al.*, 2018, Kawamura *et al.*, 2022),  
which could therefore suggest the presence of tradeoffs between some traits of interests. A  
more detailed genomic characterization of the genomic landscapes, including local linkage  
disequilibrium patterns, based on more modern varieties, are especially needed on this  
chromosome.

585

## Conclusion

Combining large phenotypic data and genetic investigations using 204 individuals  
genotyped using a high density SNP array, plus 32 whole-genome sequences, we found  
590 support for both phenotypic and genomic changes during the 19th century. With an  
unprecedented accuracy, we confirmed the progressive shift from a European to a more  
Asian-like genetic background, with Hybrid tea roses exhibiting a three-quarter Asian genetic  
background. This genetic makeup corresponds to the backcrossing of the early European x  
Asian varieties with the ancient genetic background, as it was previously suggested (Liorzou  
595 *et al.*, 2016). As a result of the lower resident diversity in the ancient Asian varieties, partly  
due to a more ancient and intense history of selection in Asia, as well as to some specific  
genomic footprints of artificial selection - especially in the region of *RoKSN* -, the rose  
breeding in Europe has contributed to a substantial loss of genetic diversity during the 19th  
century. In addition to providing a fine description of the history of rose breeding, we have  
600 generated the largest GWAS catalog to date, with the aim of providing fundamental  
knowledge for the future of rose breeding.

## Materials and methods

### 605 Sampling & DNA extraction

For the Affymetrix array, all the 288 samples were collected in the 'Rose Loubert' rose  
collection and nursery (Roseraie Loubert, Gennes-Val-de-Loire, Pays-de-La-Loire, France) in  
summer 2020 and 2021, except for *Rosa* × *wichurana* and 'Old Blush', both collected in an  
experimental collection at INRAE (UE Horticulture, Angers, Pays-de-La-Loire, France).

610 For the sequencing approach, all newly sequenced samples were selected, because of their  
presumably importance during the 19th century (considered as "star varieties" based on  
extensive literature searches on historical catalogs of varieties; Cristiana Oghina-Pavie,  
personal communication). Fresh plant material was collected in the Roseraie Loubert in  
summer 2021, with the notable exception of 'Jin Ou Fan Lu', a cultivar that was previously  
615 collected by Shubin Li in China (Liorzou *et al.*, 2016). It should be noted that we had access  
to only a small part of the ancient roses, both because of the investigated collection, but also  
because a part of the ancient varieties have not been preserved down to this day. As a  
consequence, our sampling was potentially impacted by a conservation bias.

620 For each rose, 100 mg of leaves were collected and DNA was extracted from either lyophilised or fresh leaves using the Qiagen 96 Plant Kit (Qiagen, Hilden, Germany). DNA quality and quantity were checked with the Nanodrop technologies and Qubit kit prior to sending samples to the different facilities.

### Genotyping and sequencing data

625 Genotyping was performed on 3x96-plates at the Gentyane facility (INRAE Clermont-Ferrand, France) using the Affymetrix Axiom technology. To further check the quality of the genotyping (see below), we included technical replicates (21 duplicate samples, as well as a triplicate one, shown in yellow in Table S1).

630 Regarding sequenced samples, library preparations and sequencing were performed at the Vienna BioCenter Core Facilities (VBCF, Vienna, Austria). For the library preparations, the facility used the Ultra II DNA kit for Illumina (New England Biolabs), which includes an enzymatic shearing as a first step. Quality control was performed prior to sequencing. Quality control of the obtained NGS libraries were then assessed prior to the sequencing using the Fragment Analyzer technology. The 15 genotypes were then sequenced on a single  
635 NovaSeq SP flow cell (300 cycles, 2x150 reads). Demultiplexing was also performed by the VBCF facility.

### Phenotyping

640 All phenotyping data were collected in the rose garden (Roseraie Loubert, Rosiers sur Loire, Gennes-Val-de-Loire, France). The number of petals was scored for at least two and at most five flowers. We used averaged petal counts across the different flowers.

645 For the recurrent blooming, the plants were scored in the rose garden every week during the blooming period (spring - autumn) and this experiment was replicated during three years. We have previously developed a statistical method on the flowering curve using Gaussian mixture models and created indicators, as Reg.Mag for the magnitude of reblooming (for details, see Proia et al. 2016). A value of 0 means that the rose flowers only in spring (once-flowering roses), higher is value (above 0), higher is the reblooming capacity (see Supplementary Note 1). For the sake of clarity, the index shown in Fig. 1B corresponds to a  
650 simplified version, with values corresponding to three classes of phenotypes (1: non-recurrent flowering, 2: partly recurrent, 3: recurrent flowering), an average value of the index across the three years of scoring was then computed for each individual (Fig. 1B).

655 For scent components, samples were collected during two years (2017 and/or 2018). All flowers were harvested around 10:00 am at stage 4 of flower development, as previously described (Bergougnoux *et al.*, 2007) and volatile compounds were extracted following Roccia *et al.* (2019).



660 The blackspot disease susceptibility was scored in the field over three years (2014, 2015, 2016). Each cultivar was scored, between July and September, depending on the development of disease and according to the scale indicated in Marolleau *et al.* (2019). The blackspot symptoms observed are due to natural infection with natural inoculum of fungal strains. It should be noticed that we are scoring roses in the field, with present-day strains. The strains present at the time of breeding (*i.e.* 19th century) might have been different, including their virulence gene repertoires and aggressiveness factors.

## 665 **Data analysis**

The analyses performed in the manuscript are described below, considering (i) the analyses based on the SNP array and (ii) those on the whole-genome sequencing data. All the scripts used have been made available on a github repository:

[https://github.com/roseGWASbrowser/PopGen\\_GWAS\\_19thcentury\\_roses](https://github.com/roseGWASbrowser/PopGen_GWAS_19thcentury_roses)

## 670 **1/ SNP array**

### Genotyping

We used a two-round genotyping procedure to ensure highly accurate calls, in particular regarding the GWAS analysis. First, we performed a QC analysis under Axiom Analysis Suite based on all the genotypes (288). Based on this genotyping, 4 individuals exhibited very low DQC (<0.25) and were excluded. Based on all the other individuals (with DQC > 0.85, 284 samples), we generated a first genotype matrix with FitPoly assuming a ploidy=4 for all samples.

680 Given that roses are grafted, all samples with a close genetic proximity with the rootstock cultivar used in the Loubert's rose garden were considered as sampling errors and were excluded from the dataset (7 in total). In addition to these previously excluded genotypes, we excluded 7 additional genotypes with a DQC < 0.94 and a QC Calling rate < 0.89, resulting in a dataset of 270 individuals. For this new dataset, we performed detailed QC and then converted the output in a FitPoly format thanks to FitPolyTools (version 1.1; unpublished R package by Roeland Voorrips). To take into account the variable ploidy level between individuals, with the vast majority of the accessions used expected to be either diploid or tetraploid, we generated a final genotyping matrix using FitPoly assuming ploidy=4 for all individuals, which means that diploid individuals with heterozygous alleles are generally expected to be called AABB. The rose SNP array targets 68,893 SNPs, with probes for both strands, leading to a total number of 137,786 probes (for details, see Koning-Bourcoiran *et al.*, 2015). After SNP filtering, we have obtained a dataset of 92,007 probes, corresponding to 56,467 of the 68,894 unique SNPs. Given all the difficulties associated with the genotyping of the SNP array, especially in a species with a variable ploidy level, we have made the choice of using all probes satisfying our QC criteria in the subsequent analyses (*i.e.* 35,540 SNPs are covered twice). This choice was made in order to maximize the chances of finding some genome-wide associations in our analysis, assuming the presence of background noise in the genotyping data.

### QC checking and clone exclusion

700 Given that roses are clonally propagated and used commercially worldwide, several varieties  
can be registered under different cultivar names. In addition, spontaneous somatic mutants  
exhibiting different traits (e.g. flower color or shape) are frequent in roses and could have  
therefore been registered with two different names. To exclude potential clones in the  
dataset that could bias our quantitative and population genomics analyses, we computed the  
705 proportion of similar calls between all pairs of individuals and considered all samples  
exhibiting a value higher than 0.965 as potential clones. To define this value, we considered  
the observed distribution of this metric and the lower observed value for a replicate of the  
analysis (0.973 for 'Persian yellow'), see Fig. S3 and Table S1 for a list. As a consequence,  
our clone-corrected dataset contains 204 unique samples. All subsequent analyses are  
based on this clone-corrected dataset.

710

### Population structure

We used the R package adegenet (Jombart, 2008) to explore the population structure  
among the 204 individuals. We considered the whole set of 92,007 markers for the analysis.  
We first used the df2genind (with ploidy=4) to generate the input files before using the  
715 dudi.pca function of the adegenet package. PCA results were then plotted using both the  
ggplot2 and ggrepel packages (Wickham, 2016; Slowikowski, 2023). To confirm the  
population structure observed with the PCA, we also used faststructure (Raj *et al.*, 2014),  
with K ranging from 2 to 5 groups (Fig. S5).

### GWAS

720 Before performing GWAS analyses, we further filtered the dataset in order to exclude poorly  
informative markers. SNPs with a missing rate greater than 10% and/or a Minor Allele  
Frequency (MAF) < 0.05 were discarded, resulting in a set of 46,691 markers. GWAS was  
then performed with GWASpoly (Rosyara *et al.*, 2016) for all traits using the kinship matrix  
725 and the structure inferred with a Principal Coordinates Analysis (dudi.pco, adegenet,  
Jombart, 2008). Considering both the tetraploidy and the absence of strong expectations  
regarding the additive vs. dominant effects of the genes for the studied traits, we considered  
all the potential models of gene action (*i.e.* general, additive, diplo-additive, diplo-general,  
simplex and duplex-dominant models, for details see Rosyara *et al.*, 2016). To explore the  
730 results, we first generated the qqplot and the Manhattan plot using R base, but we then  
generated circular representations of all the results under the R package circlize (Gu *et al.*,  
2014). In addition to the Manhattan plots, these circular views include density curves in order  
to identify some potentially interesting regions, even when the empirical background noise is  
high, generally associated with a general inflation of p-values (as observed with the qqplots).  
735 Given the number of traits analyzed, as well as the number of models explored for each, all  
the results were made available thanks to a dedicated website  
(<https://roseGWASbrowser.github.io/>).

## 740 **2/ Whole-genome sequences**

### Mapping and calling

In total, 32 genotypes were analyzed, corresponding to our new sequences and to a set of  
rose sequences publicly available on SRA. Briefly, we used Trimmomatic (v.0.38, Bolger *et al.*,  
745 *et al.*, 2014) to remove adapters, trim and filter reads using the following set of parameters:

LEADING:3 TRAILING:3 SLIDINGWINDOW:4:15 MINLEN:50. All trimmed reads were then mapped against a high-quality rose reference genome (Hibrand-Saint Oyant *et al.*, 2018) with BWA mem2 (v. 2.2, Vasimuddin *et al.*, 2019) using default settings. Most of the mapped data corresponds to paired ends reads but we also mapped single end reads (*i.e.* 750 corresponding to unpaired after trimming). MarkDuplicates (Picard v. 2.20.7; Picard toolkit, 2019) was then used to remove potential PCR duplicates. Variant calling was performed on GATK4 (v.4.2.2.0, Poplin *et al.*, 2018), following the GATK best practices guidelines. In brief, we performed a first round of HaplotypeCaller to generate the GVCFs, followed by a CombineGVCFs and a GenotypeGVCFs with the “--all-sites true” option. Variants were then 755 filtered with VariantFiltration, discarding variants with SOR>4.0, MQ<30, QD<2, FS>60, MQRankSum< -20, and ReadPosRankSum either <- 10 or >10.

### Ploidy inference

The ploidy level of each sample was empirically determined by considering the observed 760 allelic balance at heterozygous sites. Specifically, for each individual, we subsampled 2% of the total number of SNPs and then considered, for each individual, the heterozygous calls exhibiting a coverage greater or equal to 20 and then generated the per-individual density curves of the allelic balance based on all these SNPs. Because most of the polymorphisms are expected to be rare in the population, we can observe the first neat peak to be near 765  $f=0.25$ , 0.33 and 0.5 for tetraploids, triploids and diploids (see Fig. S12). Similar methods have been developed over the last decade to empirically estimate the ploidy level (*e.g.* ploidyNGS, Augusto Corrêa dos Santos *et al.*, 2017). To ensure that the inferred ploidy level is sufficiently robust for our subsequent analyses, we have checked the overall consistency of the results with previous in-house estimates of the ploidy level (for details, see Liorzou *et al.*, 2016 and <http://dx.doi.org/10.5281/zenodo.56704>). 770

### Population structure & kinship

Population genetic structure among the 32 cultivars was performed using Principal Component Analysis (PCA). Analyses were run on a pruned set of 50,369 biallelic SNPs, 775 which was generated by randomly selecting 50k SNPs across the genome. We used the snpgdsPCA function from the SNPRelate R package (Zheng *et al.*, 2012) to generate the PCA. We then used ggplot2 (Wickham, 2016) to generate the final plots. Given that the reference corresponds to an ancient Asian rose, we also empirically checked that the observed population structure could not have been generated by a strong mapping bias (Fig. 780 S13). As a control of the population structure observed using PCA, we also used faststructure (Raj *et al.*, 2014) on the same 50k SNP set. To do so, we first used plink (v2.00, Purcell *et al.*, 2007) to generate the input files and then inferred the population structure for K=1 to K=6. Barplots of the inferred individual ancestry memberships were also generated using ggplot2. 785

We performed a family relationship inference by estimating kinship coefficients under KING (Manichaikul *et al.*, 2010). The initial objective of this analysis was to ensure that no clones were present in our sequencing dataset (see also above). But given that KING is able to infer relationships up to the third-degree (*i.e.* great grandparents and great grandchildren, first 790 cousins, or similar), we used KING to infer some potential family relationships. We first generated the input files with plink (v2.00) and then estimated kinship coefficients. Kinship values higher than >0.354 correspond to clones, while coefficients ranging from [0.177, 0.354], [0.0884, 0.177] and [0.0442, 0.0884] correspond to 1st-degree, 2nd-degree, and 3rd-

795 degree relationships, respectively. Based on our data, KING was able to infer a remarkably high number of family relationships among our dataset composed of “star varieties” (see results). As a consequence, we used the R package igraph (Csárdi & Nepusz, 2006) to generate a comprehensive network based on all the inferred family relationships.

### 800 Nucleotide diversity estimates

As compared to population structure and kinship inferences, estimates of diversity are highly dependent on the final quality of the SNP set. To ensure unbiased estimates, we have used the filtered set of SNPs based on the 32 samples (77,862,879 filtered SNPs) to perform a Base Quality Score Recalibration (BQSR) on the 19 retained samples, as recommended by GATK in the absence of a highly-reliable SNP catalog for the focal species. Then, we used GATK's ApplyBQSR function. HaplotypeCaller was then performed assuming the inferred ploidy (see previous section) using option “--ploidy”, before using CombineGVCFs, GenotypeGVCFs and VariantFiltration as previously described to generate a final SNP set of 54,481,222 filtered SNPs. We then reconstructed whole-genome fasta sequences based on the complete VCF (vcf with variant and non-variant positions) following Leroy and collaborators (2021a, 2021b). The approach was adapted to the rose specificities to reconstruct up to 4 sequences per individual, by explicitly considering the inferred ploidy (per-individual number of alleles in the GT field). Briefly, the pipeline reconstructs the sequence by considering the coverage at each position. All positions that are not in between the 5th and 95th centiles of the individual coverage, as well as those with coverage lower than 3 were hard-masked in the reconstructed sequences. For positions satisfying the coverage criteria, the reference allele is added to the reconstructed sequences, except at PASS positions, where alleles are added according to the genotyping calls (*i.e.* the GT field). Triallelic (or more) variants were discarded. Similarly, indels were ignored to keep the sequence length the same across individuals and therefore obtain perfectly aligned sequence blocks. Nucleotide diversity and Tajima's D were then computed on non-overlapping 100-kbp sliding windows following Leroy *et al.* (2021a) for each group, based on the individuals falling in the four following groups: ancient Asian, ancient European, early European x Asian and hybrid tea roses (Table S2). A Reduction of Diversity (RoD) index was computed by  $1 - \frac{\pi_{Group1}}{\pi_{Group2}}$ , with *Group1* and *Group2* corresponding to hybrid tea roses and ancient European, respectively, for a comparison aiming at estimating the evolution of the diversity in hybrid tea roses as compared to the ancient European samples. A positive value of the RoD index therefore indicates a net reduction of the nucleotide diversity between the two groups. Circular visualization (Figure 3) was generated using the R package circlize (Gu *et al.*, 2014).

### 830 Diagnostic alleles

For each filtered SNP among the final list of 54,481,222 SNPs, allele frequencies of the four groups were computed directly based on the filtered joint vcf thanks to a home-made script (script\_freqgroup4localancestryprop.py), which was made available on the github repository ([https://github.com/roseGWASbrowser/PopGen\\_GWAS\\_19thcentury\\_roses](https://github.com/roseGWASbrowser/PopGen_GWAS_19thcentury_roses)). Given that the number of genotypes available per group is limited, allele frequency was only computed if the number of missing alleles was lower or equal to 4 (*i.e.* corresponding to a maximum of 1 tetraploid individual or 2 diploid individuals without genotyping calls). We then subsampled SNPs exhibiting diagnostic alleles, *i.e.* an allele frequency of the reference allele of 0 and 1

in one group and in the other. In this specific example, all diagnostic SNPs identified - at the notable exception of 2 SNPs that were subsequently excluded - exhibit an allele frequency of 0 in the European and of 1 in the Asian group. Indeed, all the raw sequencing data were mapped against the genome of an ancient Asian genotype ('Old Blush'; Hibrand-Saint Oyant *et al.*, 2018). Consequently, the reference alleles are expected to be more associated with the ancient Asian background. The match is almost perfect here given that we also used the Old Blush variety as a member of the ancient Asian group in our study. As a consequence, all diagnostic alleles are expected to have an allele frequency of 1 in the ancient Asian group and, consequently, 0 in the ancient European group. In total, we identified 170,637 diagnostic SNPs on our sampling. Diagnostic SNPs are observed on all chromosomes (Table S4). Importantly, the diagnostic SNPs are based on our limited panel of varieties. Consequently, all are not expected to be truly diagnostic based on a larger panel. Local ancestry of early European x Asian or hybrid tea groups was then estimated by computing the median of the observed allele frequencies at diagnostic markers. Estimates were based on non-overlapping 100-kbp sliding windows spanning the whole genome for windows containing at least 5 diagnostic SNPs.

### Local footprints of selection

To know more about the genomic regions targeted by 19<sup>th</sup> century breeders, we identified regions that could be consistent with selective sweeps. One limitation associated with the model is the recent history of the rose breeding and the associated limited number of generations of recombination (see results). As a consequence, explicit selective sweep methods could not be used here to identify potential footprints of selection. As an alternative, we identified regions simultaneously exhibiting the lowest  $\pi$ , the most negative Tajima's D and the highest RoD values. Given that this strategy does not fully circumvent the problem of the lack of generations of recombination, we have decided to focus our detection on hybrid tea roses, the latest group in the history of breeding among those investigated in this study, and therefore expected to have experienced the highest number of generations of recombination, in order to deliver more interpretable results. We considered two sets of candidate windows. The stringent set corresponds to windows falling in the last centile of the three metrics supporting a potential selective sweep (*i.e.* bottom 1% of nucleotide diversity and Tajima's D values, top 1% of the RoD comparing hybrid tea roses with either Ancient European or Ancient Asian), and a less stringent set considering the last five centiles.

875

## **Acknowledgments**

This research was conducted in the framework of the regional programme "Objectif Végétal, Research, Education and Innovation in Pays-de-la-Loire", supported by the French Region Pays-de-la-Loire, Angers Loire Métropole and the European Regional Development Fund. A part of the phenotypic data was supported by the FLORHIGE (French Region Pays-de-la-Loire), the SIFLOR (BAP division of INRAE) and Rosascent projects (ANR, grant number ANR-16-CE20-0024-01). We acknowledge the Biological Resource Center (Pome Fruits and Roses, Angers, France) for managing rose genetic resources. Thibault Leroy is also grateful to the university of Vienna, Austria for its financial support regarding the whole-genome sequencing of the rose cultivars. We would like to thank the Next Generation Sequencing Facility at Vienna BioCenter Core Facilities (VBCF), member of the Vienna BioCenter (VBC),

885

890 Austria. We are grateful to the genotoul bioinformatics platform Toulouse Occitanie (Bioinfo  
Genotoul, <https://doi.org/10.15454/1.5572369328961167E12>) for providing computing and  
storage resources. We also thank Jérôme Chené (Pépinière Roses Loubert, Gennes-Val-de-  
Loire, Pays-de-La-Loire, France) for providing fresh plant material of a few whole-genome  
resequenced individuals.

## 895 **References**

- Allaby RG, Ware RL, Kistler L. 2019. A re-evaluation of the domestication bottleneck from  
archaeogenomic evidence. *Evolutionary Applications* 12: 29–37.
- 900 Alqudah AM, Sallam A, Stephen Baenziger P, Börner A. 2020. GWAS: Fast-forwarding gene  
identification and characterization in temperate Cereals: lessons from Barley – A review.  
*Journal of Advanced Research* 22: 119–135.
- Altman A, Shennan S, Odling-Smee J. 2022. Ornamental plant domestication by aesthetics-  
driven human cultural niche construction. *Trends in Plant Science* 27: 124–138.
- 905 Augusto Corrêa Dos Santos R, Goldman GH, Riaño-Pachón DM. 2017. ploidyNGS: visually  
exploring ploidy with Next Generation Sequencing data. *Bioinformatics (Oxford, England)* 33:  
2575–2576.
- Bergougnoux V, Caissard J-C, Jullien F, Magnard J-L, Scalliet G, Cock JM, Hugueney P,  
Baudino S. 2007. Both the adaxial and abaxial epidermal layers of the rose petal emit volatile  
910 scent compounds. *Planta* 226: 853–866.
- Bolger AM, Lohse M, Usadel B. 2014. Trimmomatic: a flexible trimmer for Illumina sequence  
data. *Bioinformatics (Oxford, England)* 30: 2114–2120.
- Brown TA. 2019. Is the domestication bottleneck a myth? *Nature Plants* 5: 337–338.
- 915 Caissard J-C, Adrar I, Conart C, Paramita SN, Baudino S. 2023. Do we really know the scent  
of roses? *Botany Letters* 170: 77–88.
- Chowdhuri TK, Deka K. 2019. Biodiversity and Conservation of Ornamental Crops.  
*Conservation and Utilization of Horticultural Genetic Resources*.
- Clotault J, Foucher F, Grapin A, Hibrand-Saint Oyant L, Malécot V, Paillard S, Pernet A,  
Soufflet-Freslon V, Oghina-Pavie C. 2022. Rose selection in France: a long and beautiful  
920 history. *Chronica Horticulturae* 62: 28–37.
- Convention on Biological Diversity. 2022. COP15: Final text of Kunming-Montreal Global  
Biodiversity Framework.
- Csárdi G, Nepusz T. 2006. The igraph software package for complex network research.
- 925 Debray K, Le Paslier M-C, Bérard A, Thouroude T, Michel G, Marie-Magdelaine J, Bruneau  
A, Foucher F, Malécot V. 2022. Unveiling the Patterns of Reticulated Evolutionary Processes

- with Phylogenomics: Hybridization and Polyploidy in the Genus *Rosa*. *Systematic Biology* 71: 547–569.
- Diamond J. 2002. Evolution, consequences and future of plant and animal domestication. *Nature* 418: 700–707.
- 930 Diamond JM. 2005. *Guns, germs, and steel: the fates of human societies*. New York: Norton.
- Ducomet, V. 1903. Une maladie des feuilles du Rosier *Marsonia Rosae* Briosi et cav. in *Le Jardin*: 199.
- François L, Verdenaud M, Fu X, Ruleman D, Dubois A, Vandenbussche M, Bendahmane A, Raymond O, Just J, Bendahmane M. 2018. A miR172 target-deficient AP2-like gene correlates with the double flower phenotype in roses. *Scientific Reports* 8: 12912.
- 935 Gattolin S, Cirilli M, Pacheco I, Ciacciulli A, Da Silva Linge C, Mauroux J-B, Lambert P, Cammarata E, Bassi D, Pascal T, *et al.* 2018. Deletion of the miR172 target site in a TOE-type gene is a strong candidate variant for dominant double-flower trait in Rosaceae. *The Plant Journal* 96: 358–371.
- 940 Gaut BS, Díez CM, Morrell PL. 2015. Genomics and the Contrasting Dynamics of Annual and Perennial Domestication. *Trends in Genetics* 31: 709–719.
- Gessert G. 1993. Flowers of Human Presence: Effects of Esthetic Values on the Evolution of Ornamental Plants. *Leonardo* 26: 37–44.
- 945 Gessert G. 2010. *Green Light: Toward an Art of Evolution*. The MIT Press.
- Goody J. 1993. *The Culture of Flowers*. Cambridge University Press.
- Gu Z, Gu L, Eils R, Schlesner M, Brors B. 2014. circlize implements and enhances circular visualization in R. *Bioinformatics* 30: 2811–2812.
- Hibrand Saint-Oyant L, Ruttink T, Hamama L, Kirov I, Lakhwani D, Zhou NN, Bourke PM, Daccord N, Leus L, Schulz D, *et al.* 2018. A high-quality genome sequence of *Rosa chinensis* to elucidate ornamental traits. *Nature Plants* 4: 473–484.
- 950 Iwata H, Gaston A, Remay A, Thouroude T, Jeauffre J, Kawamura K, Oyant LH-S, Araki T, Denoyes B, Foucher F. 2012. The TFL1 homologue KSN is a regulator of continuous flowering in rose and strawberry. *The Plant journal: for cell and molecular biology* 69: 116–125.
- 955 Jombart T. 2008. adegenet: a R package for the multivariate analysis of genetic markers. *Bioinformatics* 24: 1403–1405.
- Kawamura K, Ueda Y, Matsumoto S, Horibe T, Otagaki S, Wang L, Wang G, Hibrand-Saint Oyant L, Foucher F, Linde M, *et al.* 2022. The identification of the *Rosa* S-locus provides new insights into the breeding and wild origins of continuous-flowering roses. *Horticulture Research* 9: uhac155.
- 960

- 965 Koning-Boucoiran CFS, Esselink GD, Vukosavljev M, van 't Westende WPC, Gitonga VW, Krens FA, Voorrips RE, van de Weg WE, Schulz D, Debener T, *et al.* 2015. Using RNA-Seq to assemble a rose transcriptome with more than 13,000 full-length expressed genes and to develop the WagRhSNP 68k Axiom SNP array for rose (*Rosa* L.). *Frontiers in plant science* 6: 249.
- Korte A, Farlow A. 2013. The advantages and limitations of trait analysis with GWAS: a review. *Plant methods* 9: 29.
- 970 Leroy T, Anselmetti Y, Tilak M-K, Bérard S, Csukonyi L, Gabrielli M, Scornavacca C, Milá B, Thébaud C, Nabholz B. 2021a. A bird's white-eye view on avian sex chromosome evolution. *Peer Community Journal* 1.
- Leroy T, Rousselle M, Tilak M-K, Caizergues AE, Scornavacca C, Recuerda M, Fuchs J, Illera JC, De Swardt DH, Blanco G, *et al.* 2021b. Island songbirds as windows into evolution in small populations. *Current Biology* 31: 1303-1310.e4.
- 975 Leus L, Van Laere K, De Riek J, Van Huylenbroeck J. 2018. Rose. In: Van Huylenbroeck J, ed. *Ornamental Crops*. Cham: Springer International Publishing, 719–767.
- Liorzou M, Pernet A, Li S, Chastellier A, Thouroude T, Michel G, Malécot V, Gaillard S, Briée C, Foucher F, *et al.* 2016. Nineteenth century French rose (*Rosa* sp.) germplasm shows a shift over time from a European to an Asian genetic background. *Journal of Experimental Botany* 67: 4711–4725.
- 980 Lopez Arias DC, Chastellier A, Thouroude T, Bradeen J, Van Eck L, De Oliveira Y, Paillard S, Foucher F, Hibrand-Saint Oyant L, Soufflet-Freslon V. 2020. Characterization of black spot resistance in diploid roses with QTL detection, meta-analysis and candidate-gene identification. *Theoretical and Applied Genetics* 133: 3299–3321.
- 985 Magnard J-L, Roccia A, Caissard J-C, Vergne P, Sun P, Hecquet R, Dubois A, Hibrand-Saint Oyant L, Jullien F, Nicolè F, *et al.* 2015. Biosynthesis of monoterpene scent compounds in roses. *Science* 349: 81–83.
- Manichaikul A, Mychaleckyj JC, Rich SS, Daly K, Sale M, Chen W-M. 2010. Robust relationship inference in genome-wide association studies. *Bioinformatics (Oxford, England)* 26: 2867–2873.
- 990 Marolleau B, Petiteau A, Bellanger M-N, Sannier M, Le Pocreau N, Porcher L, Paillard S, Foucher F, Thouroude T, Serres-Giardi L, *et al.* 2020. Strong differentiation within *Diplocarpon rosae* strains based on microsatellite markers and greenhouse-based inoculation protocol on *Rosa*. *Plant Pathology* 69: 1093–1107.
- 995 Marriott M. 2003. *Encyclopedia of Rose Science*.
- Martin M, Piola F, Chessel D, Jay M, Heizmann P. 2001. The domestication process of the Modern Rose: genetic structure and allelic composition of the rose complex. *Theoretical and Applied Genetics* 102: 398–404.
- 1000 Moyers BT, Morrell PL, McKay JK. 2018. Genetic Costs of Domestication and Improvement. *Journal of Heredity* 109: 103–116.



- Nei M, Maruyama T, Chakraborty R. 1975. The bottleneck effect and genetic variability in populations. *Evolution* 29: 1–10.
- Oghină-Pavie C. 2020. La raison des rosomanes. Les sciences naturelles dans le Journal des Roses à la fin du XIXe siècle. *Romantisme* 190: 64-78.
- 1005 Oghină-Pavie C. 2021. Les rosiers et la nouveauté horticole en France au début du XIXe siècle, in J. Baudry, J. Blanc, L. Hilaire-Pérez, M. Ratcliff, S. Wenger (eds), *Produire du nouveau ? Arts-techniques-sciences en Europe (1400-1900)*, Paris, CNRS Éditions: 83-94.
- Picard toolkit. 2019. *Broad Institute*, GitHub repository <https://broadinstitute.github.io/picard/>
- 1010 Pont C, Leroy T, Seidel M, Tondelli A, Duchemin W, Armisen D, Lang D, Bustos-Korts D, Goué N, Balfourier F, *et al.* 2019. Tracing the ancestry of modern bread wheats. *Nature Genetics* 51: 905–911.
- Poplin R, Ruano-Rubio V, DePristo M, Fennell J, Carneiro M, Auwera G, Kling D, Gauthier L, Levy-Moonshine A, Roazen D, *et al.* 2018. Scaling accurate genetic variant discovery to tens of thousands of samples. *bioRxiv*: 201178.
- 1015 Proïa F, Pernet A, Thouroude T, Michel G, Clotault J. 2016. On the characterization of flowering curves using Gaussian mixture models. *Journal of Theoretical Biology* 402: 75–88.
- Purcell S, Neale B, Todd-Brown K, Thomas L, Ferreira MAR, Bender D, Maller J, Sklar P, de Bakker PIW, Daly MJ, *et al.* 2007. PLINK: a tool set for whole-genome association and population-based linkage analyses. *American journal of human genetics* 81: 559–575.
- 1020 Purugganan MD. 2022. What is domestication? *Trends in ecology & evolution* 37: 663–671.
- Raj A, Stephens M, Pritchard JK. 2014. fastSTRUCTURE: variational inference of population structure in large SNP data sets. *Genetics* 197: 573–589.
- 1025 Raymond O, Gouzy J, Just J, Badouin H, Verdenaud M, Lemainque A, Vergne P, Moja S, Choisne N, Pont C, *et al.* 2018. The *Rosa* genome provides new insights into the domestication of modern roses. *Nature Genetics* 50: 772–777.
- Roccia A, Hibrand-Saint Oyant L, Cavel E, Caissard J-C, Machenaud J, Thouroude T, Jeauffre J, Bony A, Dubois A, Vergne P, *et al.* 2019. Biosynthesis of 2-Phenylethanol in Rose Petals Is Linked to the Expression of One Allele of RhPAAS. *Plant physiology* 179: 1064–1079.
- 1030 Rosyara UR, De Jong WS, Douches DS, Endelman JB. 2016. Software for Genome-Wide Association Studies in Autopolyploids and Its Application to Potato. *The Plant Genome* 9: plantgenome2015.08.0073.
- 1035 Schulz DF, Schott RT, Voorrips RE, Smulders MJM, Linde M, Debener T. 2016. Genome-Wide Association Analysis of the Anthocyanin and Carotenoid Contents of Rose Petals. *Frontiers in plant science* 7: 1798.

- Shang H, Field DL, Paun O, Rendón-Anaya M, Hess J, Vogl C, Liu J, Ingvarsson PK, Lexer C, Leroy T. 2023. Drivers of genomic landscapes of differentiation across a *Populus* divergence gradient. *Molecular Ecology*, in press.
- 1040 Slowikowski K. 2023. ggrepel: Automatically Position Non-Overlapping Text Labels with 'ggplot2'.
- Smith O, Nicholson WV, Kistler L, Mace E, Clapham A, Rose P, Stevens C, Ware R, Samavedam S, Barker G, *et al.* 2019. A domestication history of dynamic adaptation and genomic deterioration in Sorghum. *Nature Plants* 5: 369–379.
- 1045 Smulders MJM, Voorrips RE, Esselink GD, Santos Leonardo TM, van 't Westende WPC, Vukosavljev M, Koning-Boucoiran CFS, van de Weg WE, Arens P, Schulz D, *et al.* 2015. Development of the WagRhSNP Axiom SNP array based on sequences from tetraploid cut roses and garden roses. In: Acta Horticulturae. International Society for Horticultural Science (ISHS), Leuven, Belgium, 177–184.
- 1050 Soufflet-Freslon V, Araou E, Jeauffre J, Thouroude T, Chastellier A, Michel G, Mikanagi Y, Kawamura K, Banfield M, Oghina-Pavie C, *et al.* 2021. Diversity and selection of the continuous-flowering gene, RoKSN, in rose. *Horticulture Research* 8: 76.
- Spiller M, Berger RG, Debener T. 2010. Genetic dissection of scent metabolic profiles in diploid rose populations. *Theoretical and Applied Genetics* 120: 1461–1471.
- 1055 Vasimuddin M, Misra S, Li H, Aluru S. 2019. Efficient Architecture-Aware Acceleration of BWA-MEM for Multicore Systems. In: 314–324.
- Wickham H. 2016. *ggplot2: Elegant Graphics for Data Analysis*. Springer-Verlag New York.
- Wissemann V, Ritz CM. 2007. Evolutionary patterns and processes in the genus *Rosa* (Rosaceae) and their implications for host-parasite co-evolution. *Plant Systematics and Evolution* 266: 79–89.
- 1060 Zheng X, Levine D, Shen J, Gogarten SM, Laurie C, Weir BS. 2012. A high-performance computing toolset for relatedness and principal component analysis of SNP data. *Bioinformatics (Oxford, England)* 28: 3326–3328.
